# Supplementary material for: The design, synthesis and biological evaluation of novel thiamin diphosphate analog inhibitors against the pyruvate dehydrogenase multienzyme complex E1 from Escherichia coli
Source: Royal Society of Chemistry journal article supplement (doi:10.1039/c4ob01347f), 2014-01-01

## Supplementary Information

for

### **The design, synthesis and biological evaluation of novel thiamin diphosphate analog inhibitors against pyruvate dehydrogenase multienzyme complex E1 from *Escherichia coli***

Lingling Feng,<sup>a</sup> Junbo He,<sup>a, b</sup> Haifeng He,<sup>a</sup> Lulu Zhao,<sup>a</sup> Lingfu Deng,<sup>c</sup> Li Zhang,<sup>a</sup> Lin Zhang,<sup>a</sup>  
Yanliang Ren,<sup>a</sup> Jian Wan,<sup>\* a</sup> and Hongwu He<sup>\* a</sup>

<sup>a</sup>Key Laboratory of Pesticide & Chemical Biology (CCNU), Ministry of Education; College of  
Chemistry, Central China Normal University, Wuhan 430079, China.

<sup>b</sup>College of Food Science and Engineering, Wuhan Polytechnic University, Wuhan 430023, China

<sup>c</sup>College of life science, Central China Normal University, Wuhan 430079, China.

# 1. The copies of all NMR spectra of the compounds

## <sup>13</sup>C NMR of 4a in DMSO-d<sub>6</sub>

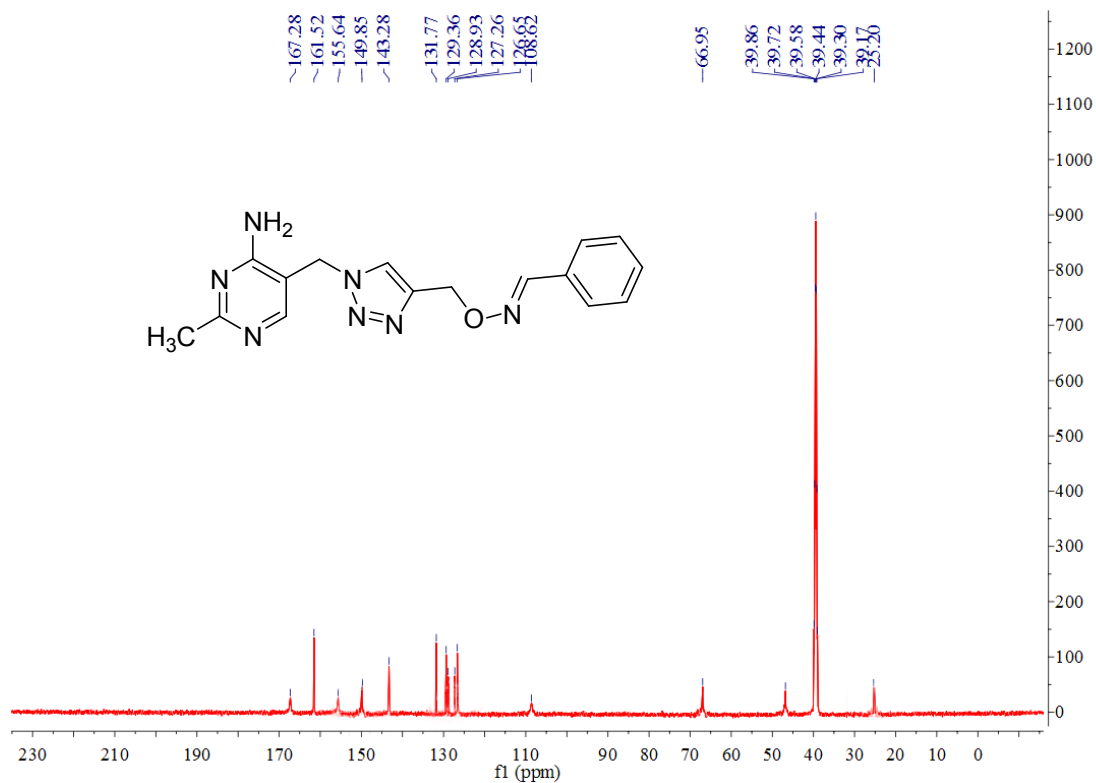

## <sup>1</sup>H NMR of 4a in DMSO-d<sub>6</sub>

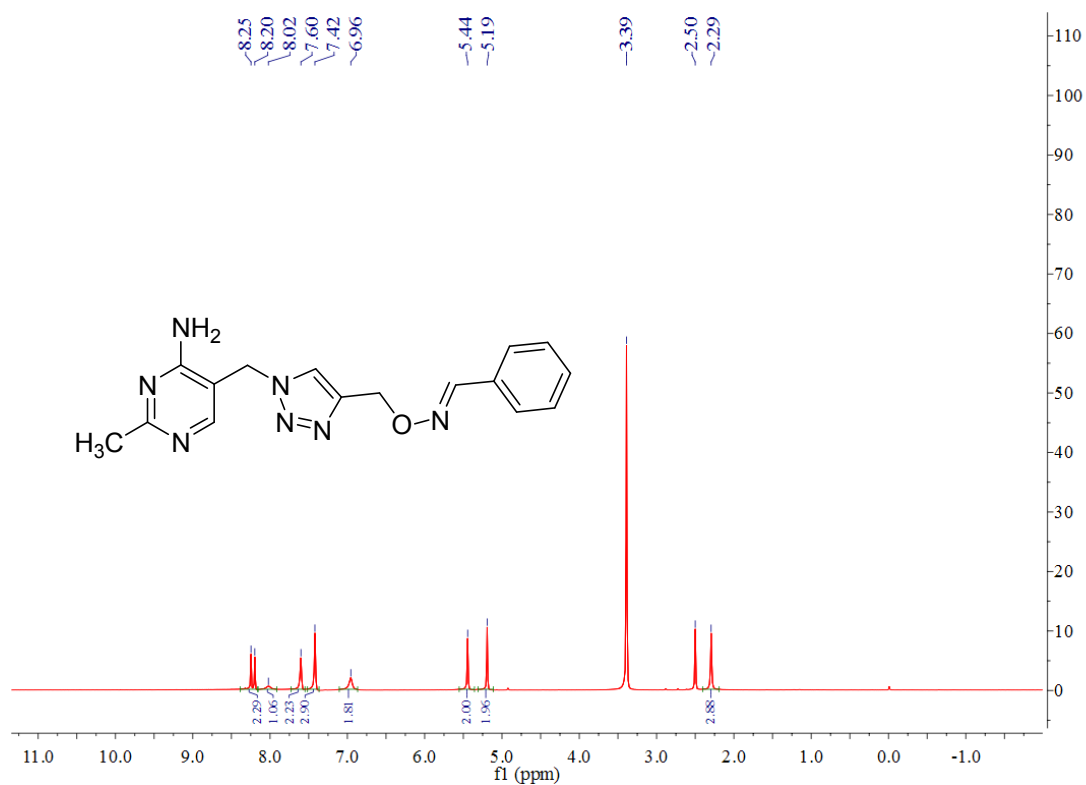

### <sup>13</sup>C NMR of **4b** in DMSO-*d*<sub>6</sub>

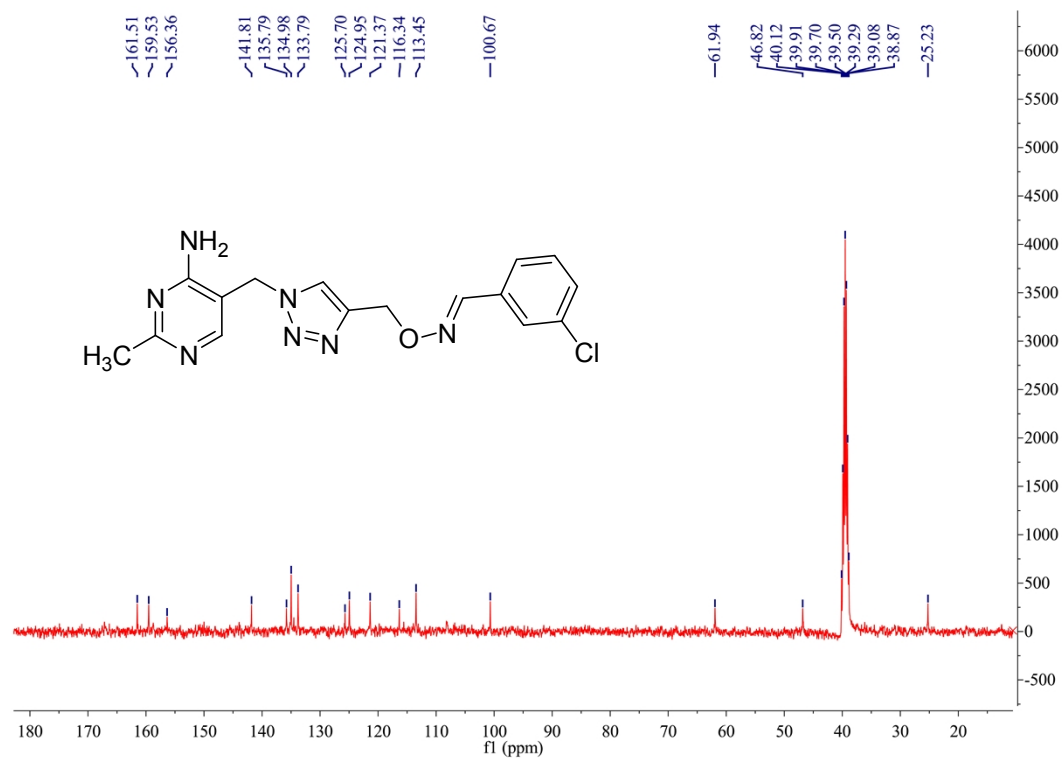

### <sup>1</sup>H NMR of **4b** in DMSO-*d*<sub>6</sub>

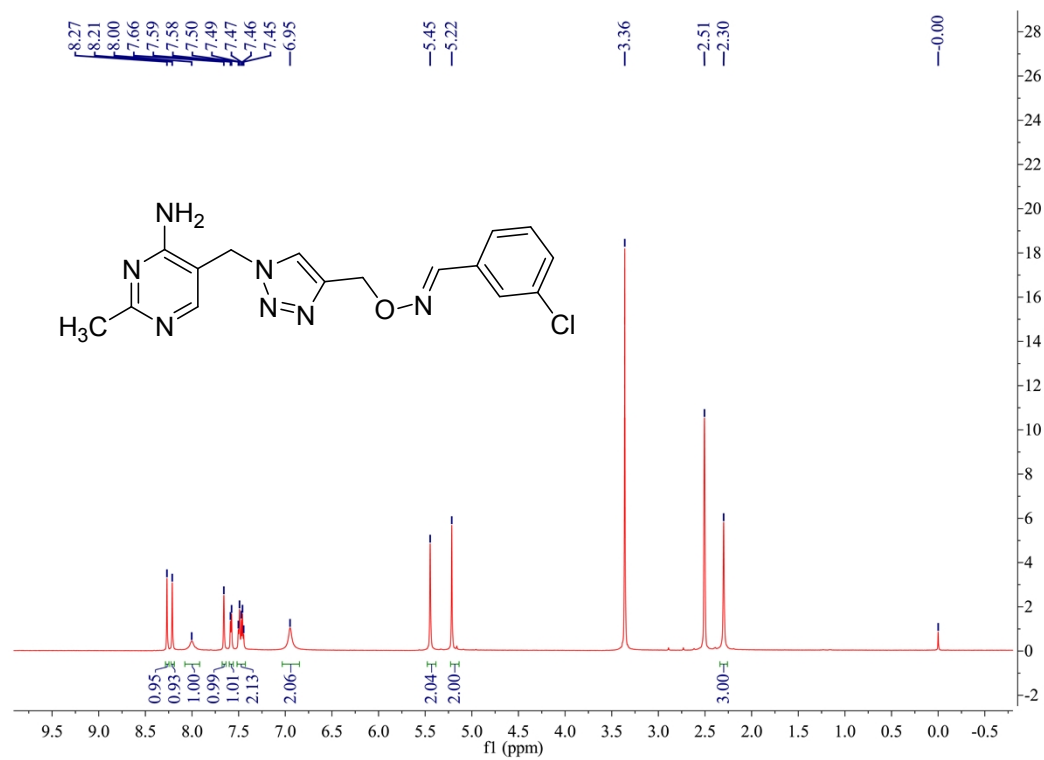

### <sup>13</sup>C NMR of **4c** in DMSO-*d*<sub>6</sub>

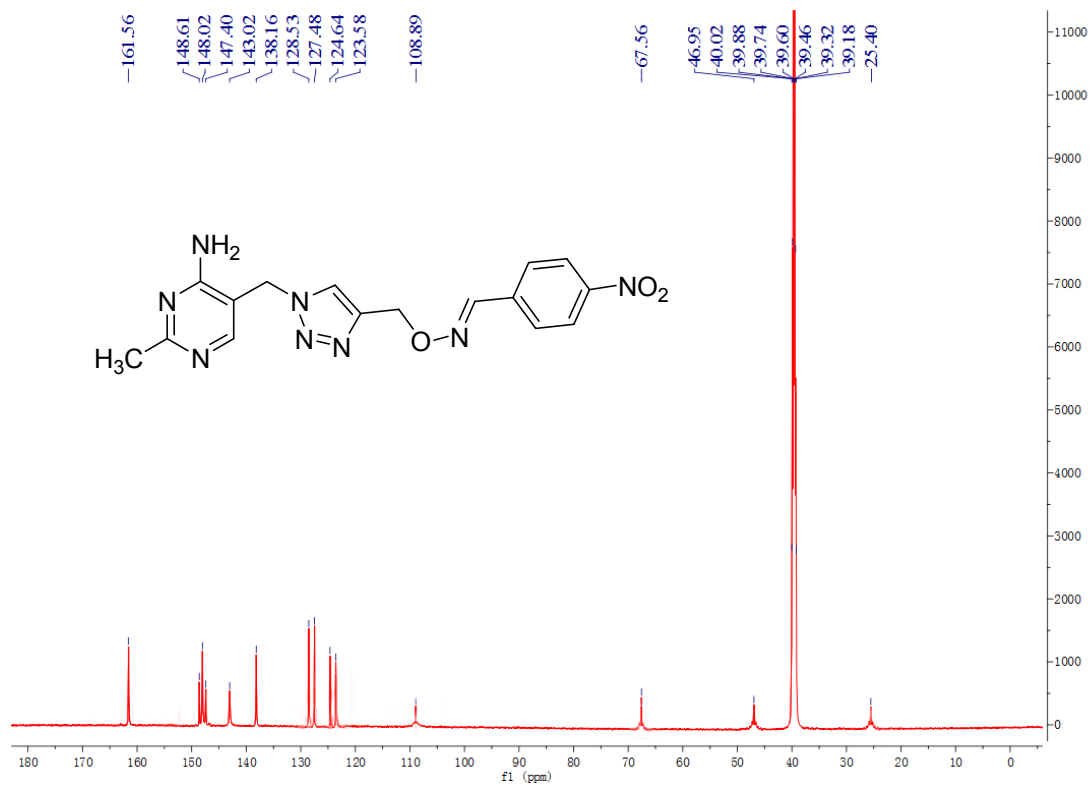

### <sup>1</sup>H NMR of **4c** in DMSO-*d*<sub>6</sub>

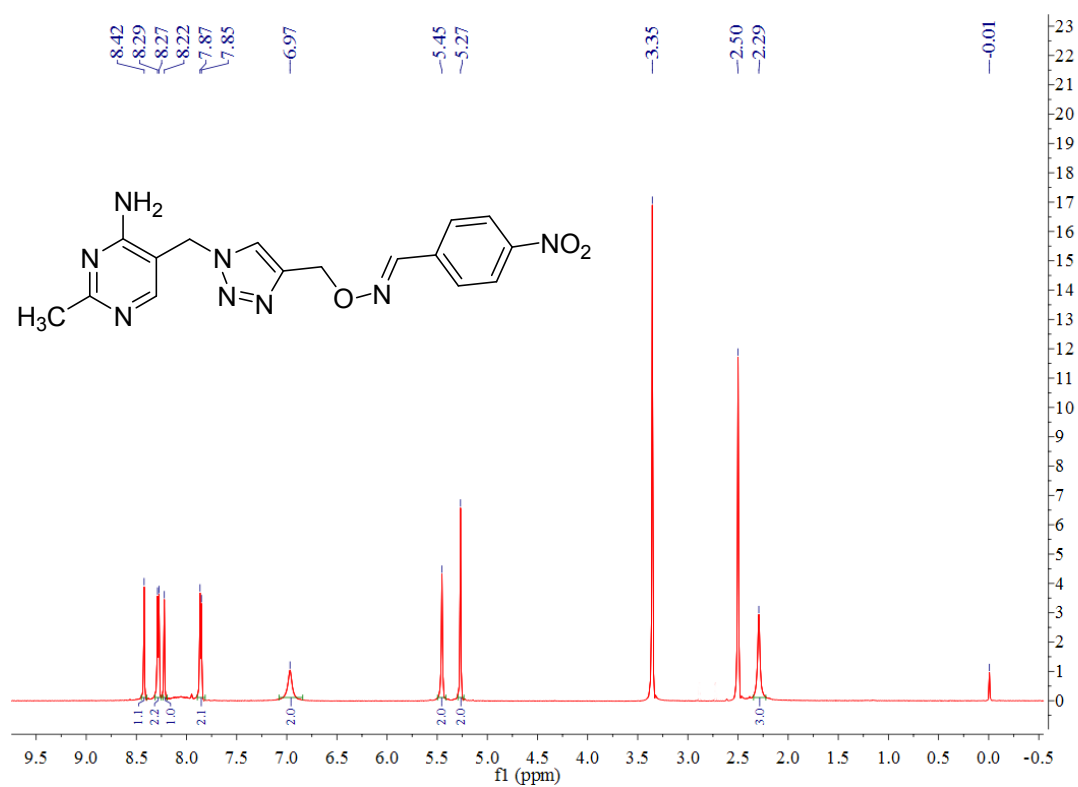

### <sup>13</sup>C NMR of **4d** in DMSO-*d*<sub>6</sub>

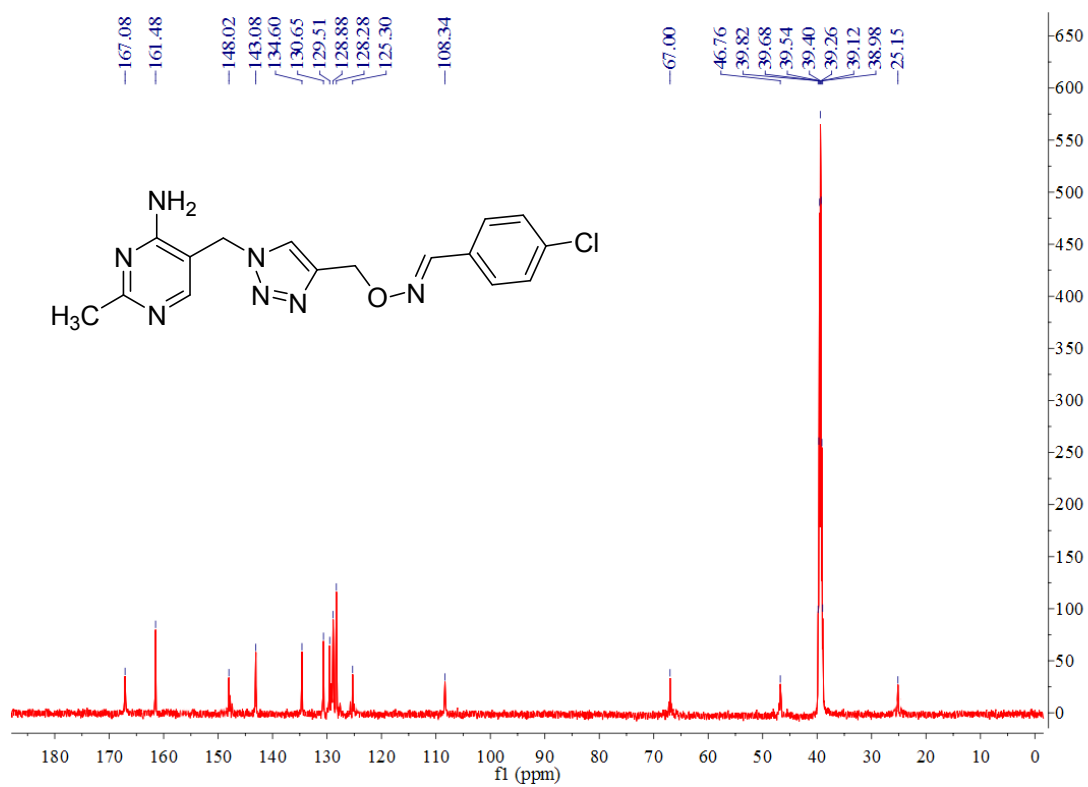

### <sup>1</sup>H NMR of **4d** in DMSO-*d*<sub>6</sub>

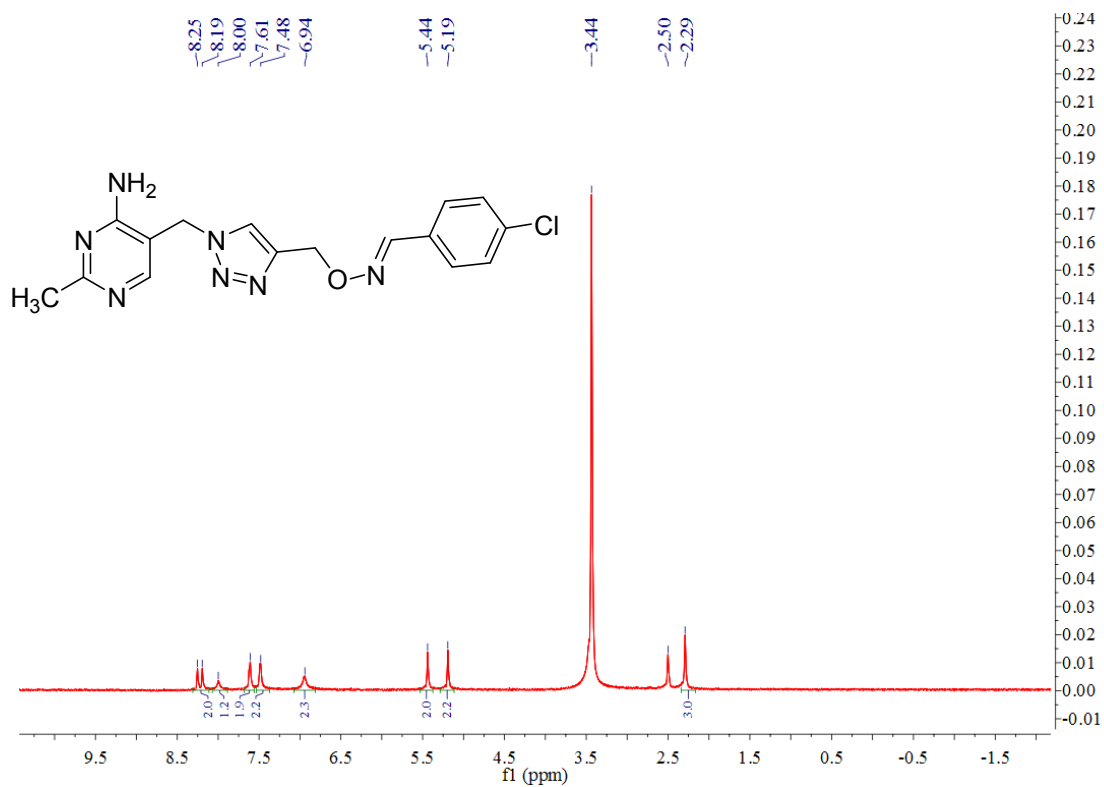

### $^{13}\text{C}$ NMR of **4e** in DMSO- $d_6$

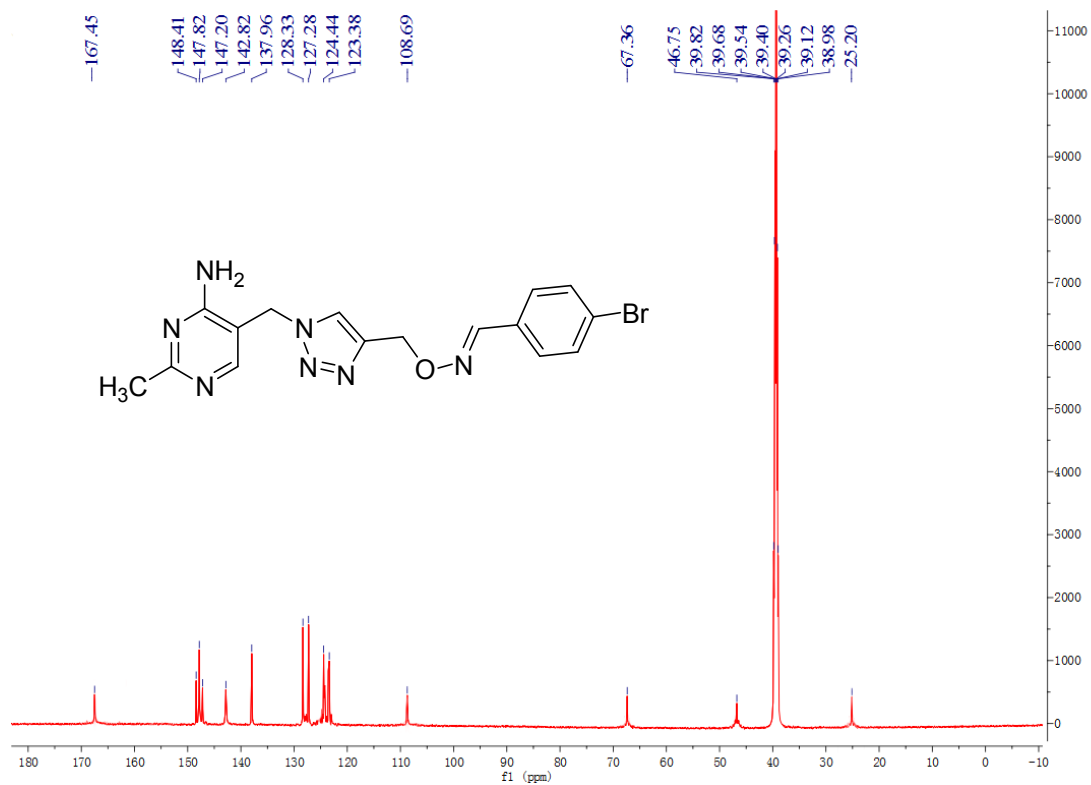

### $^1\text{H}$ NMR of **4e** in DMSO- $d_6$

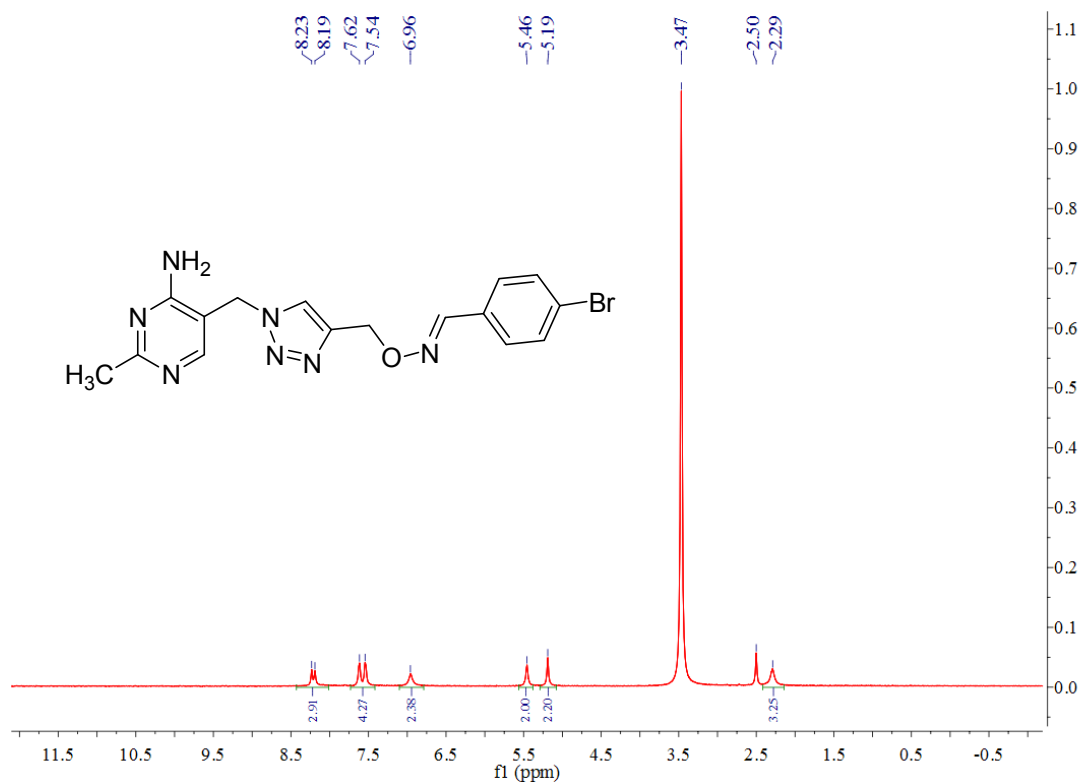

### $^{13}\text{C}$ NMR of **4f** in $\text{DMSO-}d_6$

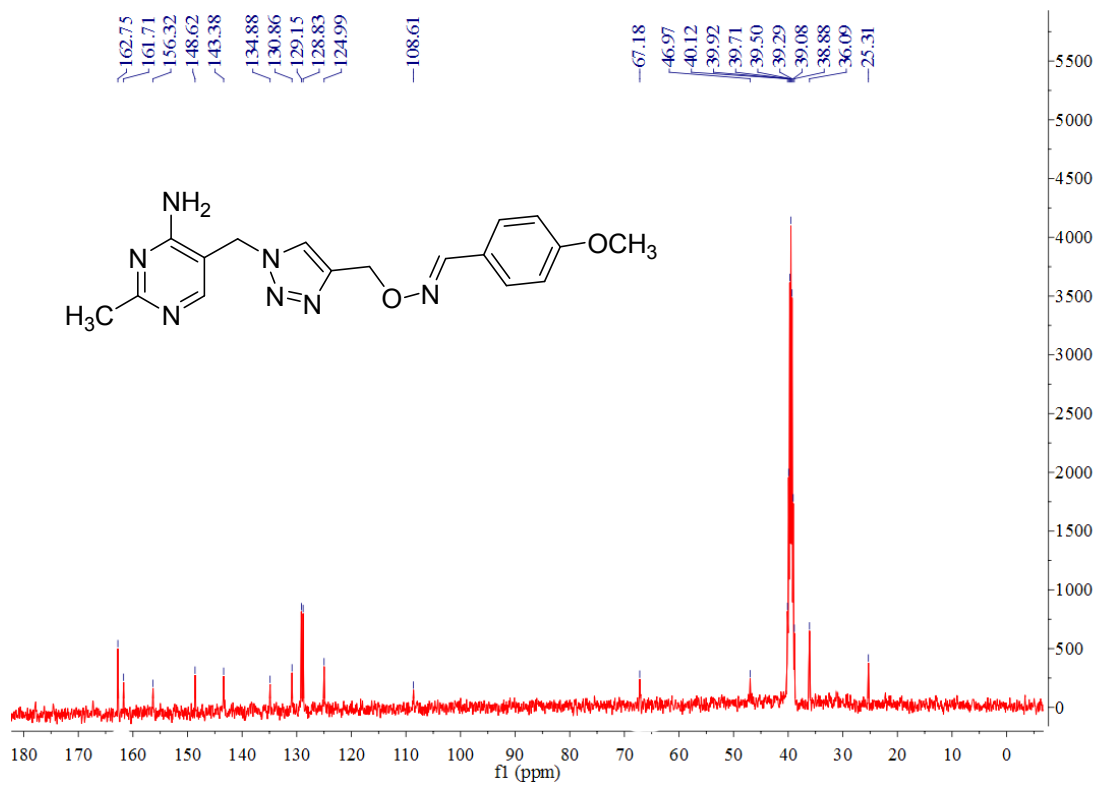

### $^1\text{H}$ NMR of **4f** in $\text{DMSO-}d_6$

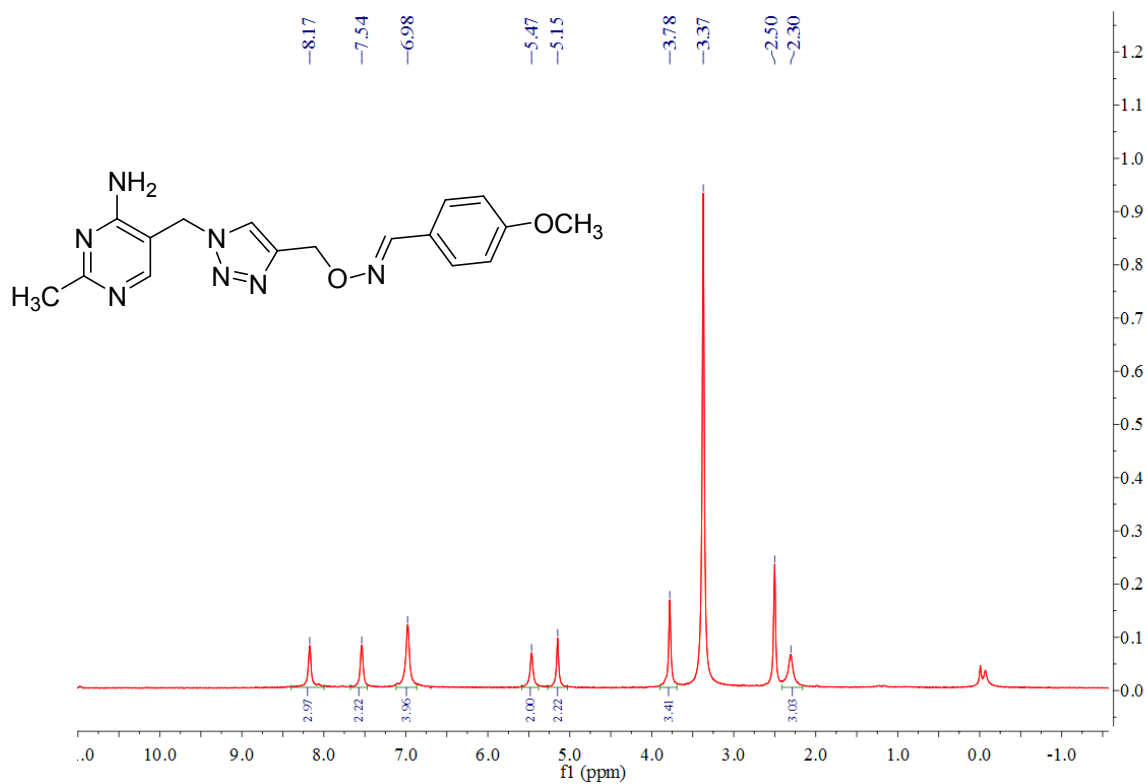

### <sup>13</sup>C NMR of **4g** in DMSO-d<sub>6</sub>

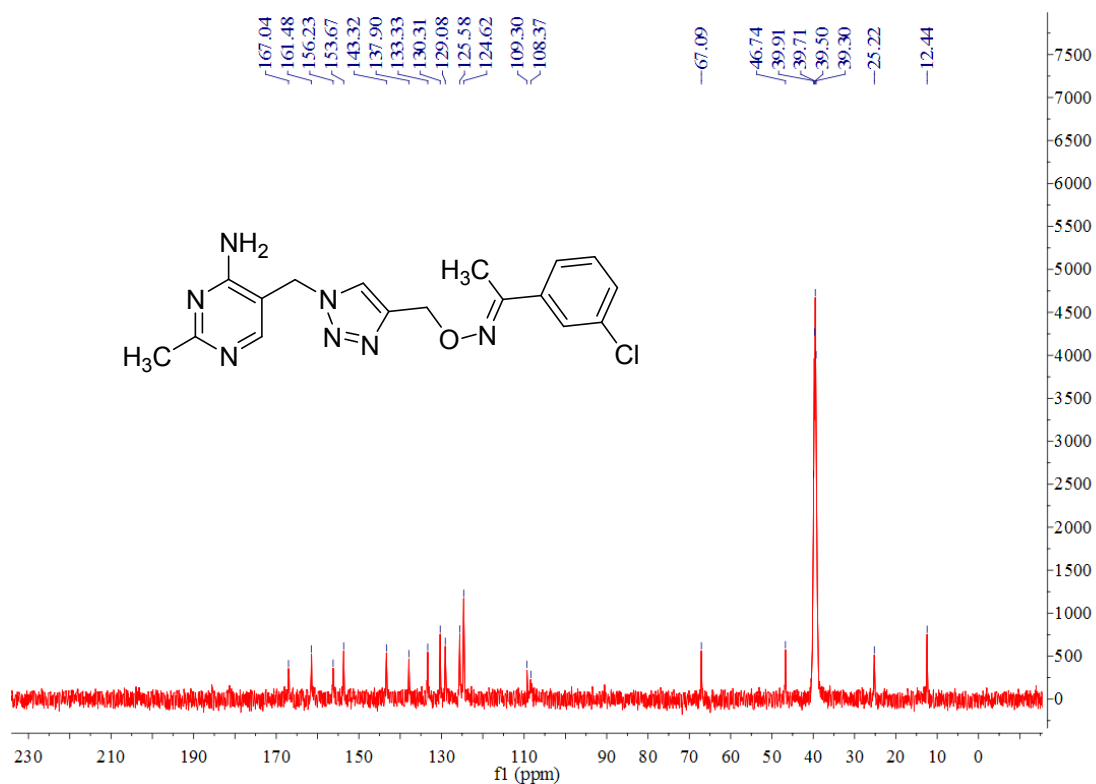

### <sup>1</sup>H NMR of **4g** in DMSO-d<sub>6</sub>

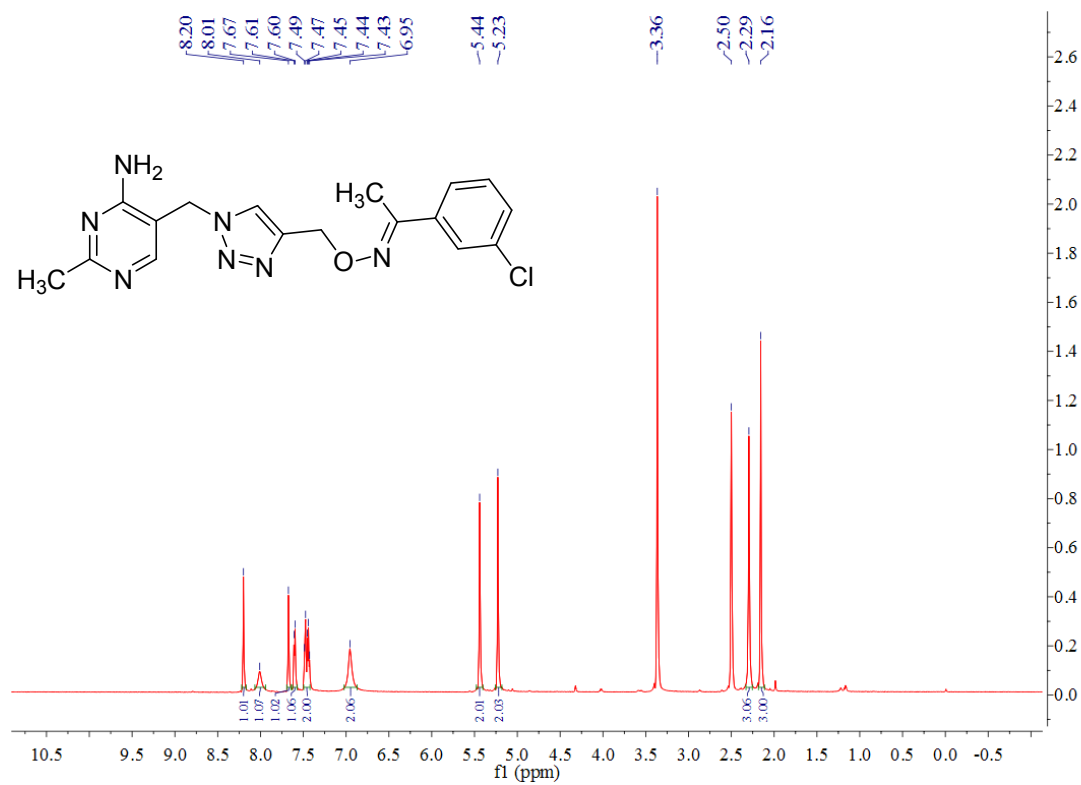



### <sup>13</sup>C NMR of **4h** in DMSO-*d*<sub>6</sub>

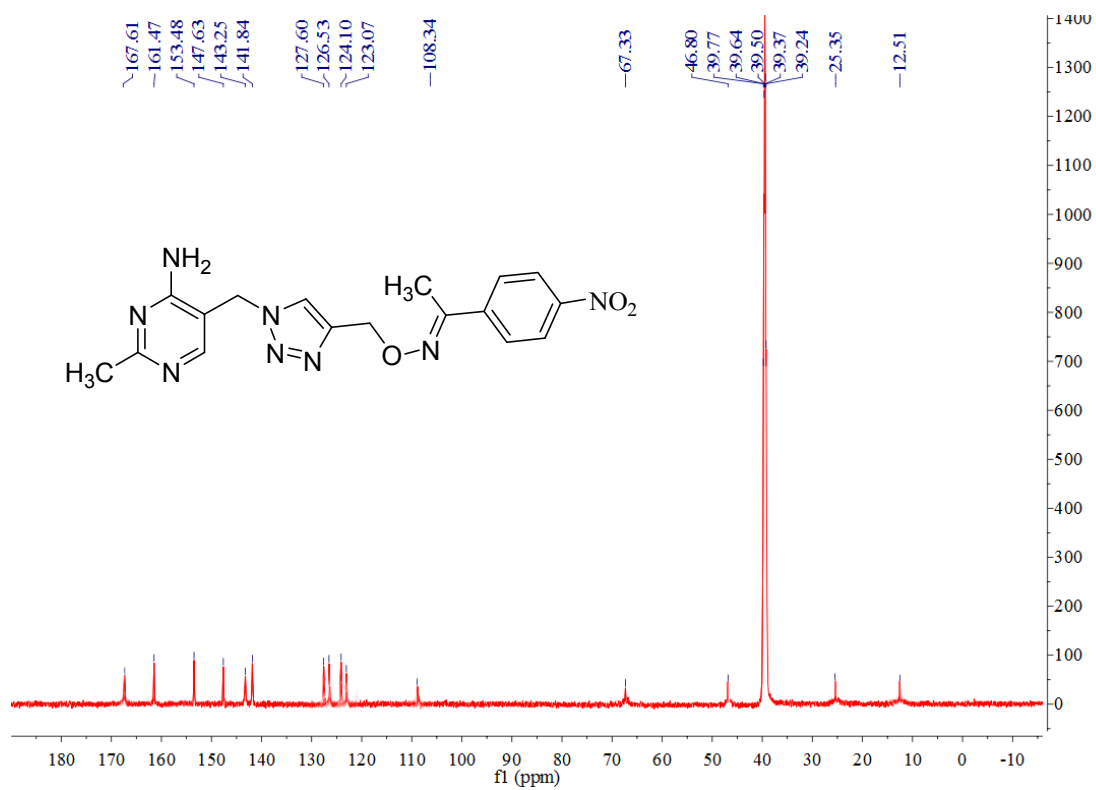

### <sup>1</sup>H NMR of **4h** in DMSO-*d*<sub>6</sub>

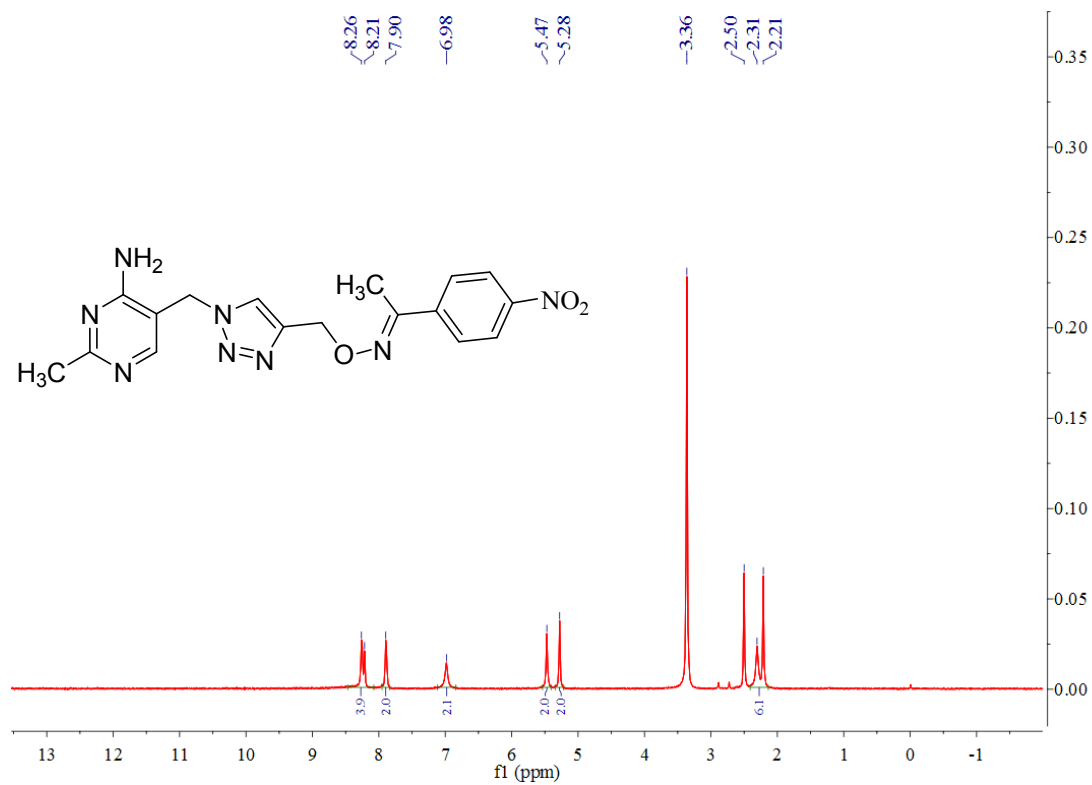

### <sup>13</sup>C NMR of **4i** in DMSO-*d*<sub>6</sub>

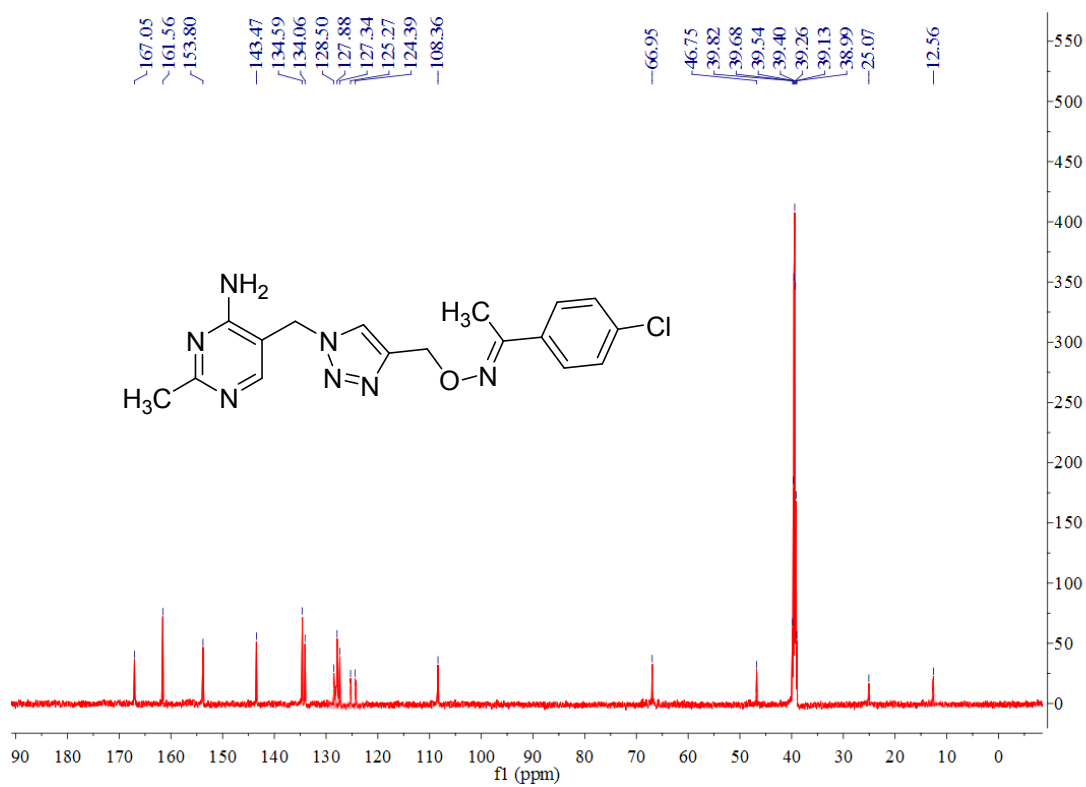

### <sup>1</sup>H NMR of **4i** in DMSO-*d*<sub>6</sub>

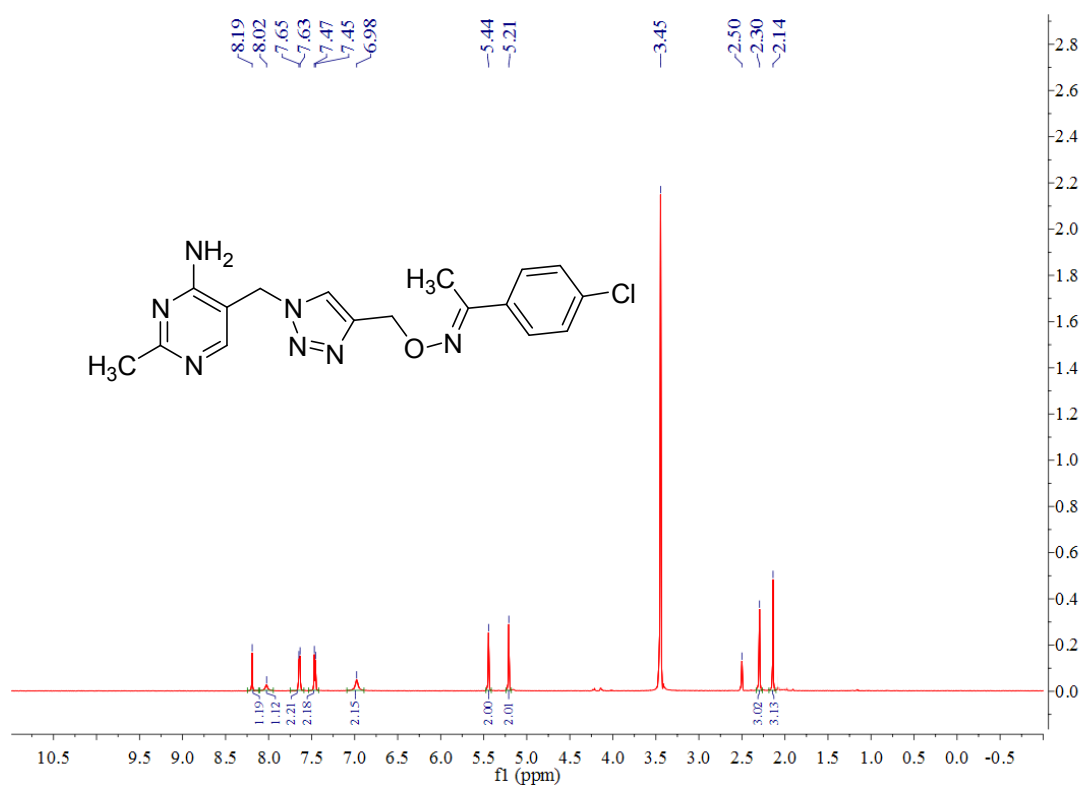

### <sup>13</sup>C NMR of **4j** in DMSO-*d*<sub>6</sub>

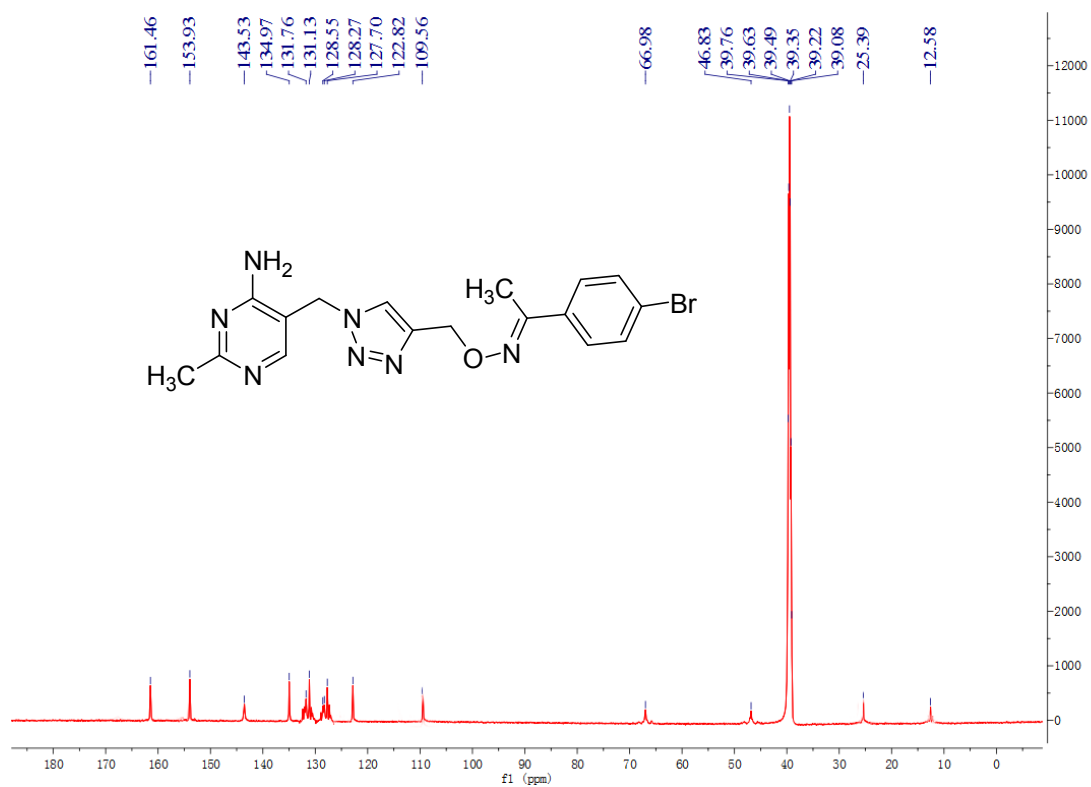

### <sup>1</sup>H NMR of **4j** in DMSO-*d*<sub>6</sub>

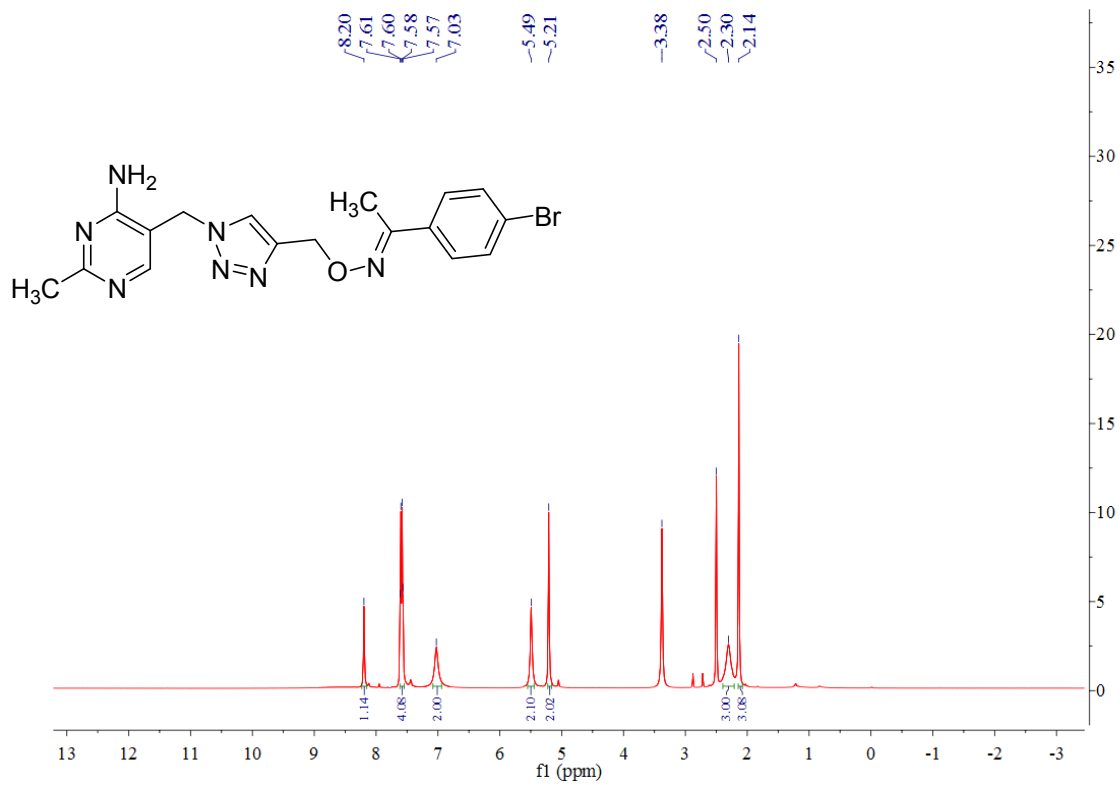

### <sup>13</sup>C NMR of **4k** in DMSO-d<sub>6</sub>

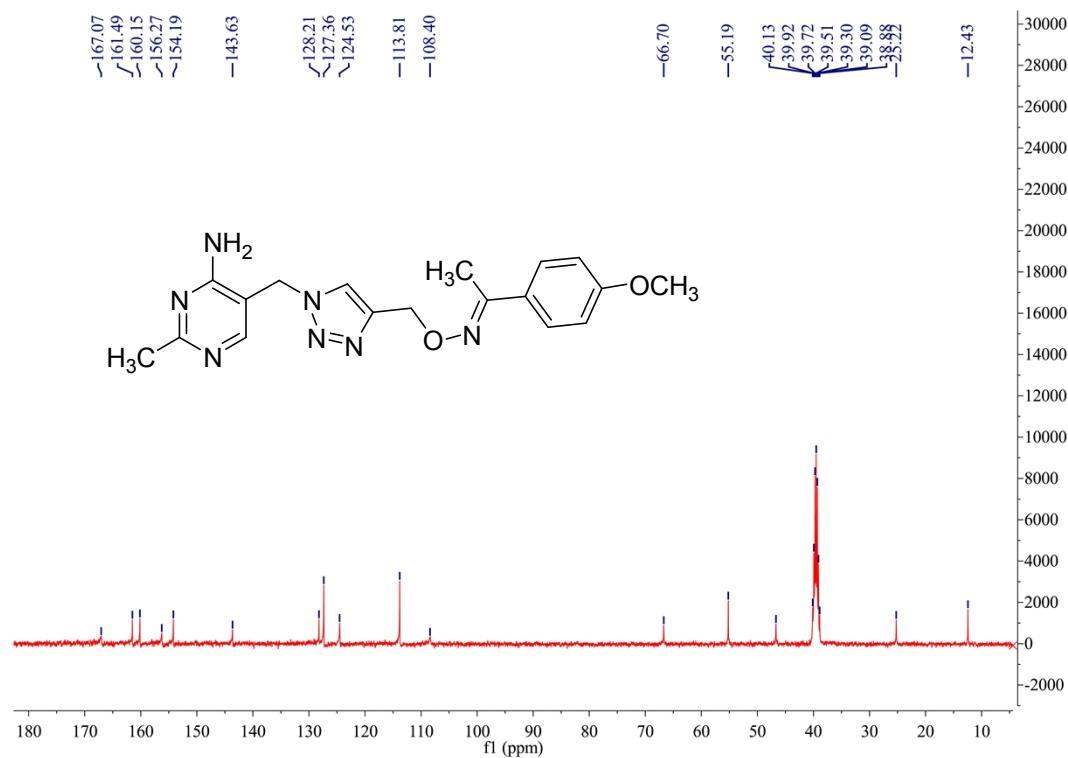

### <sup>1</sup>H NMR of **4k** in DMSO-d<sub>6</sub>

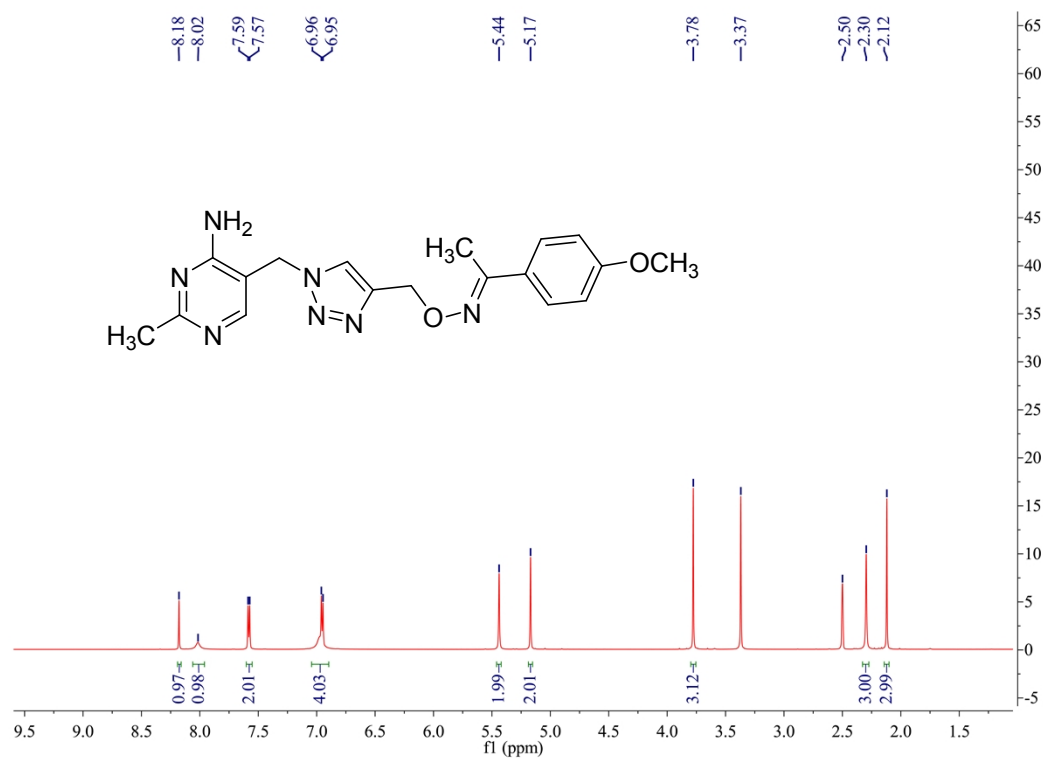

### <sup>13</sup>C NMR of **4I** in DMSO-*d*<sub>6</sub>

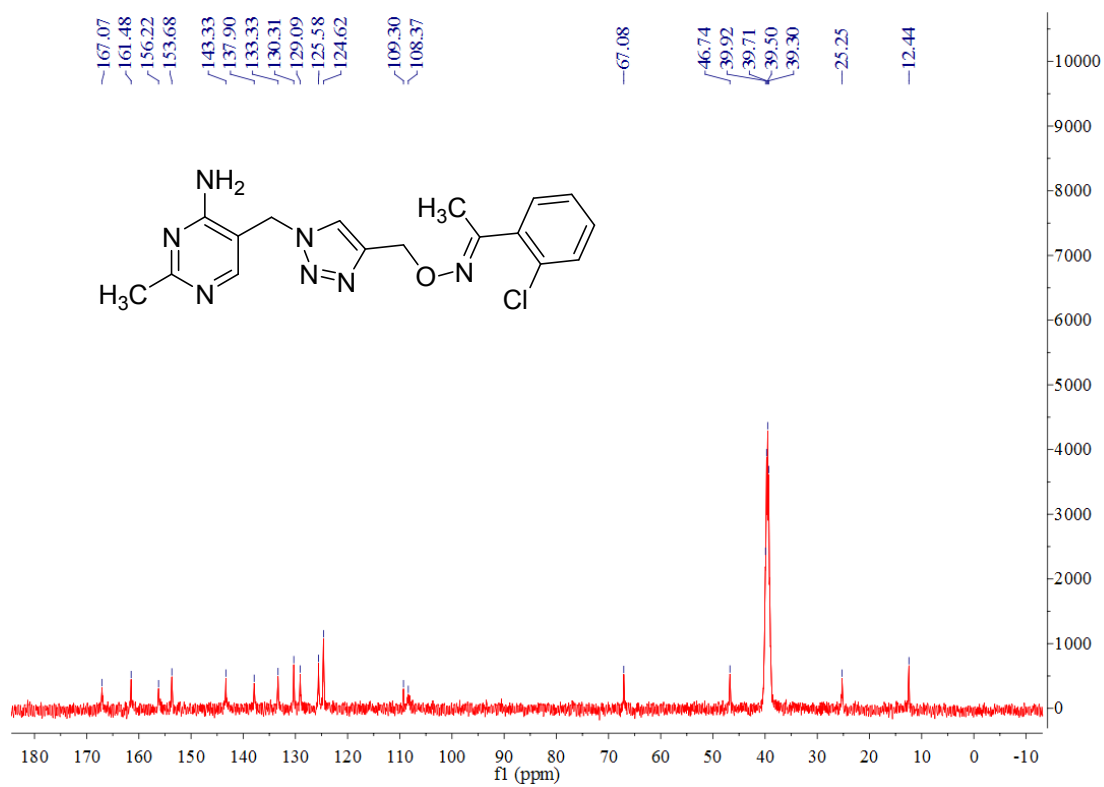

### <sup>1</sup>H NMR of **4I** in DMSO-*d*<sub>6</sub>

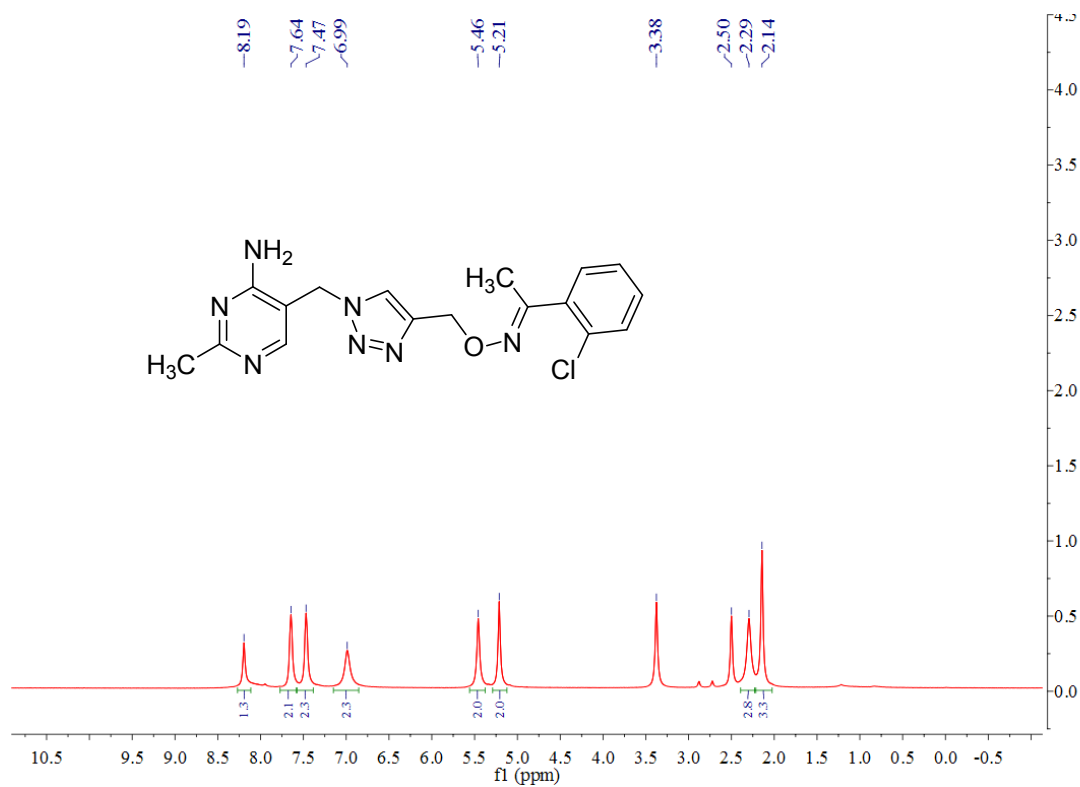

## 2. The representative figures for the dose-response effect of all applicable assays

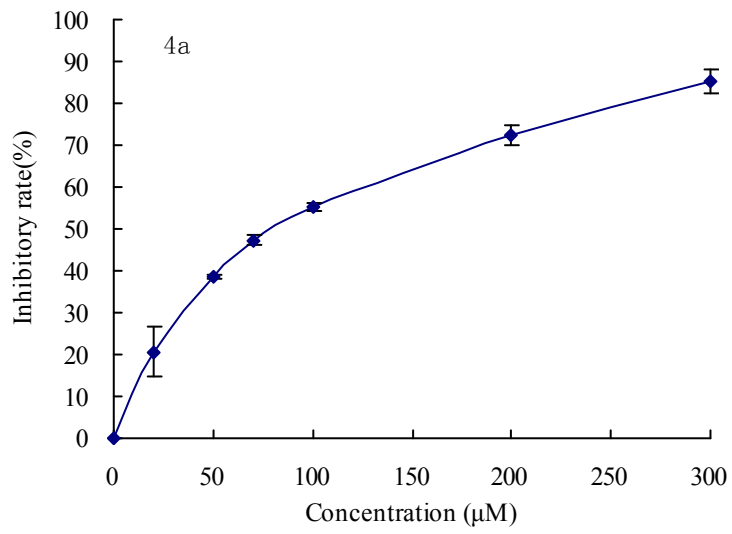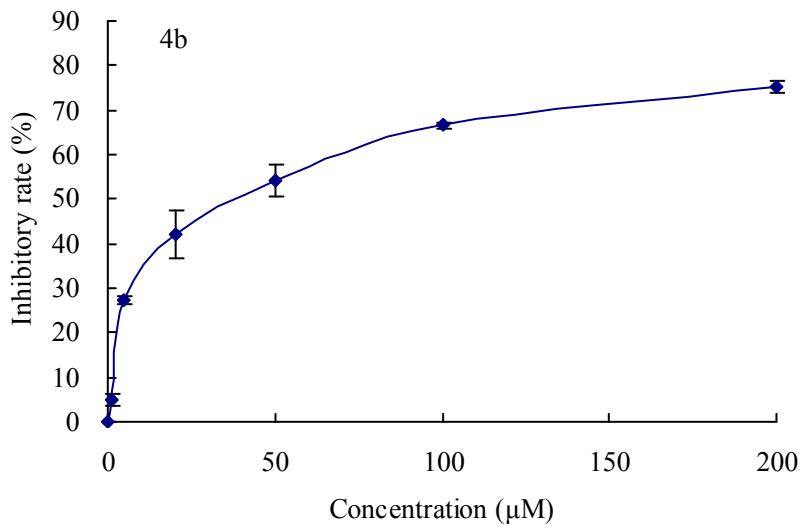

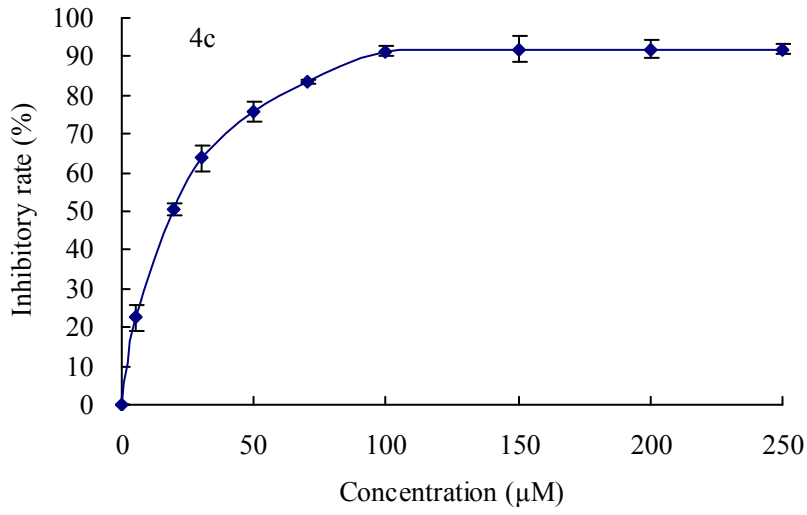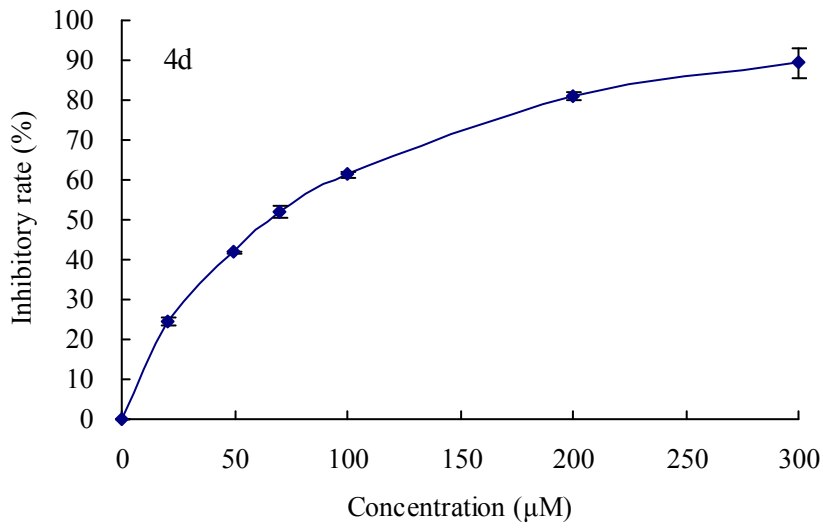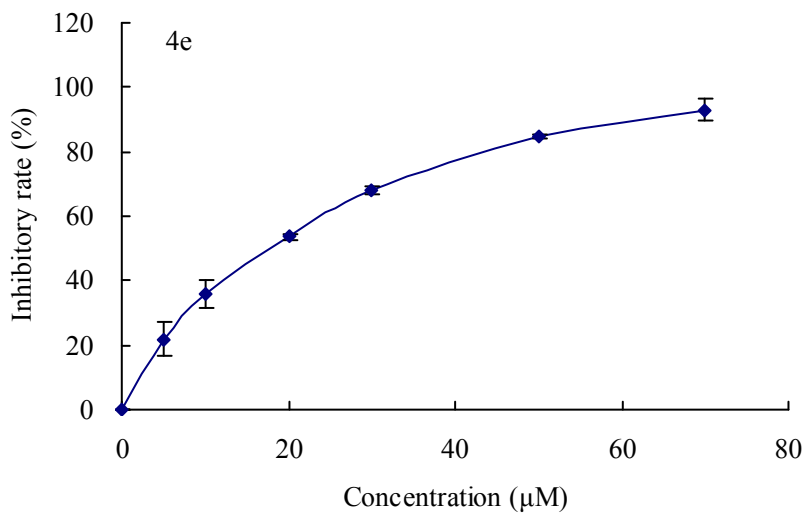

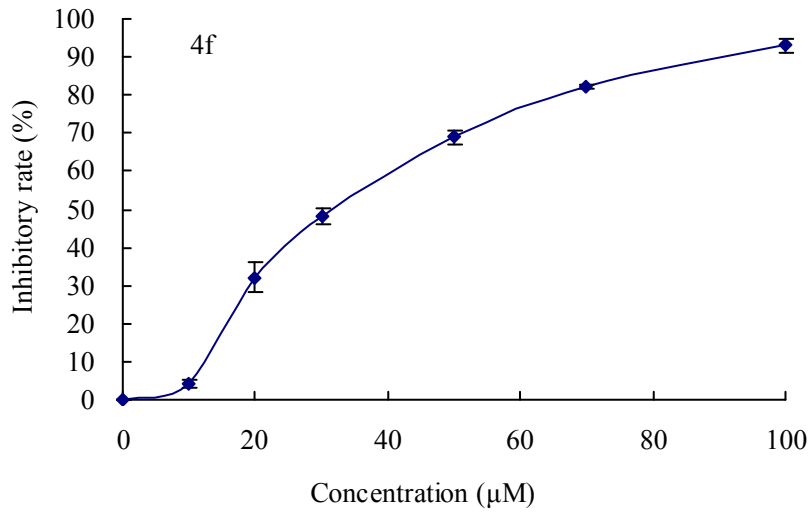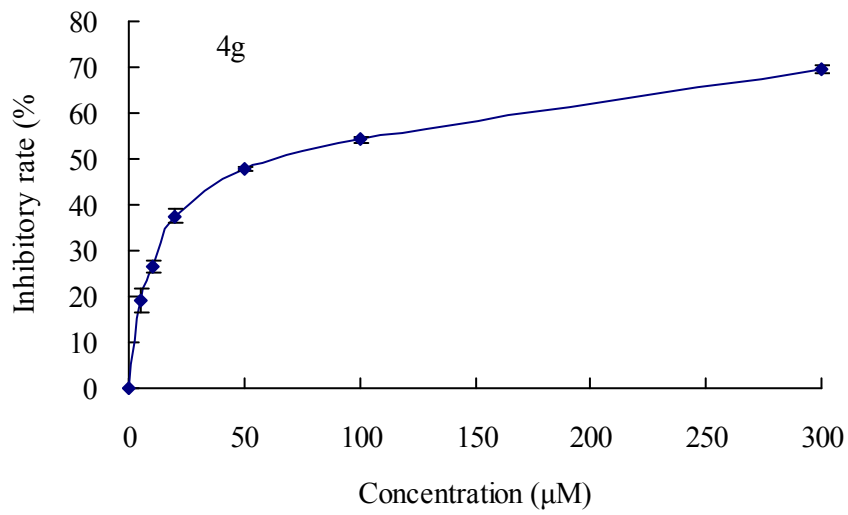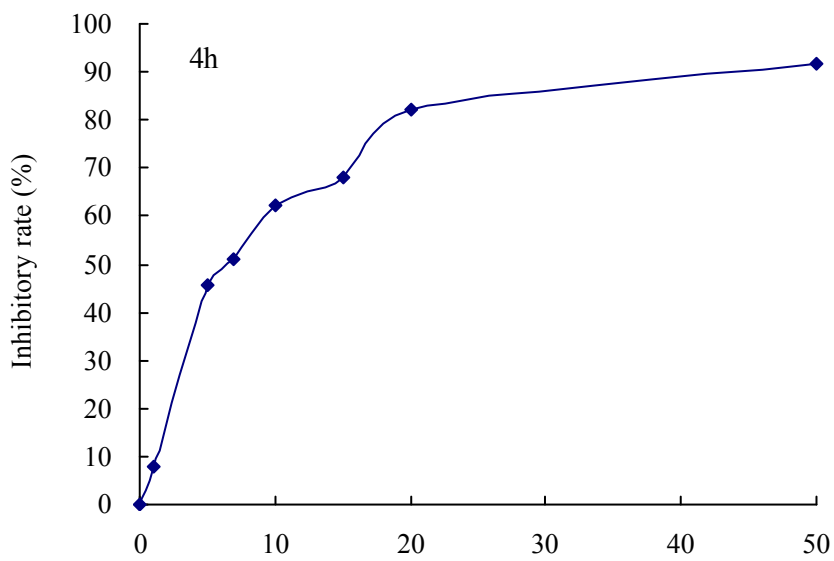



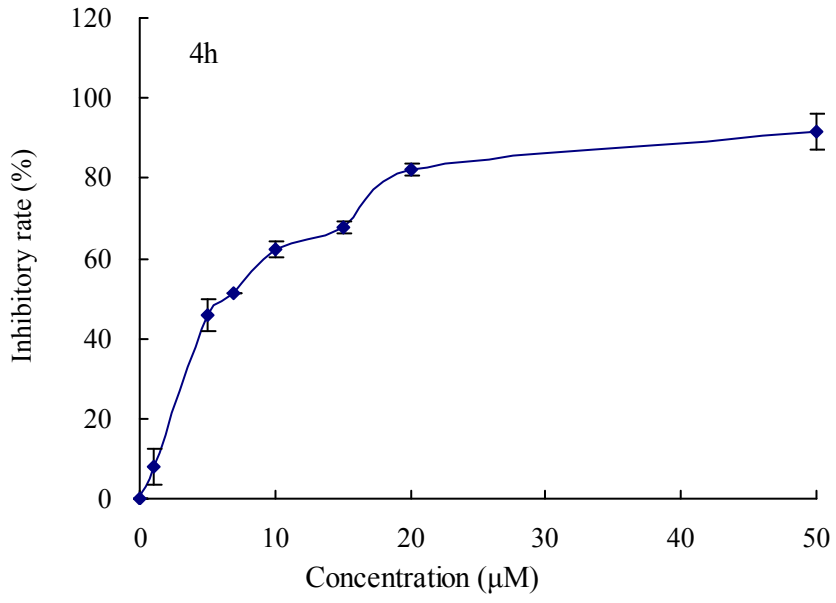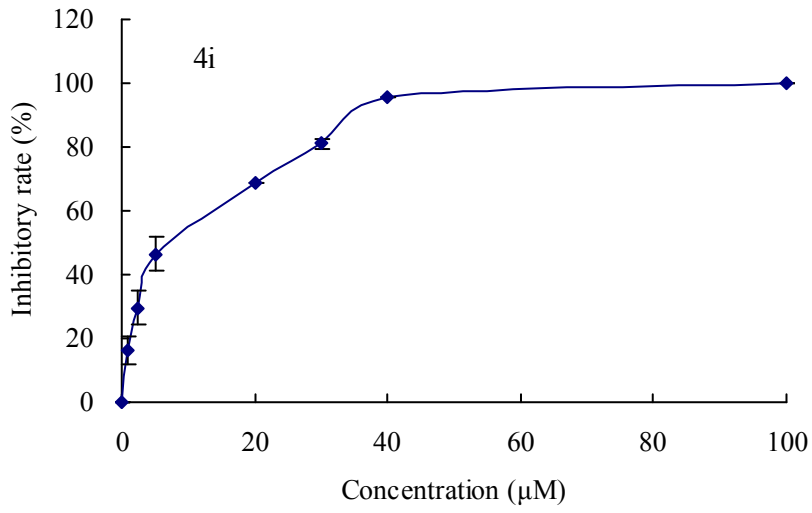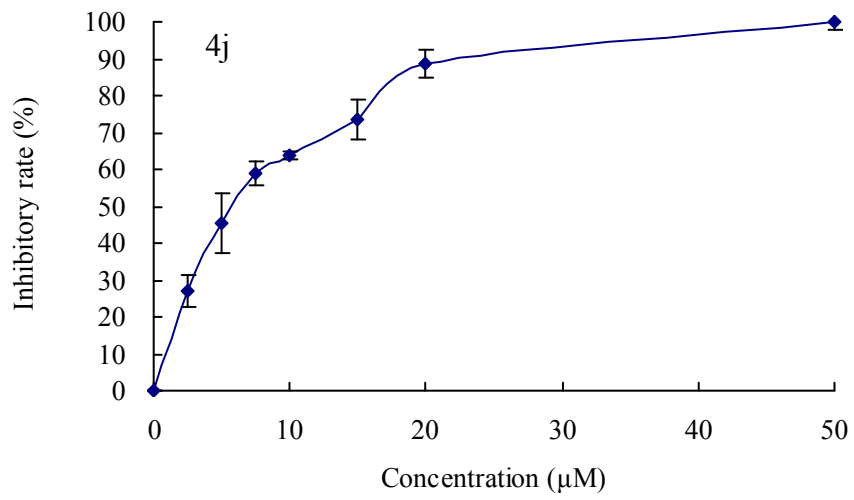

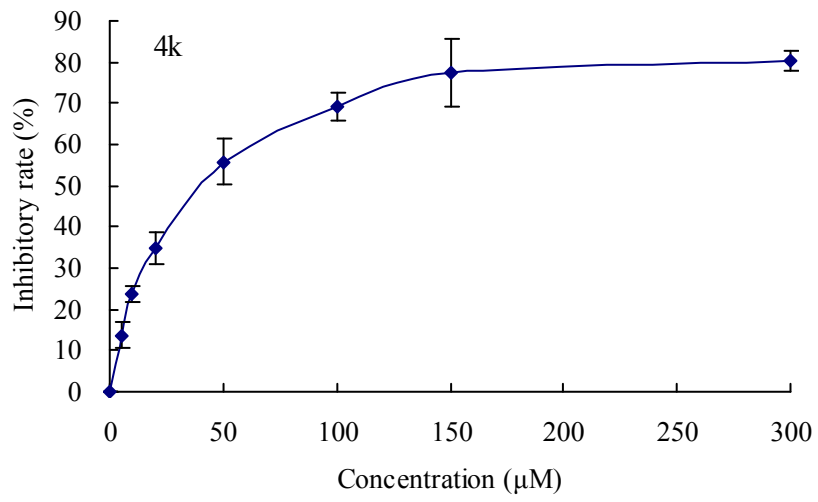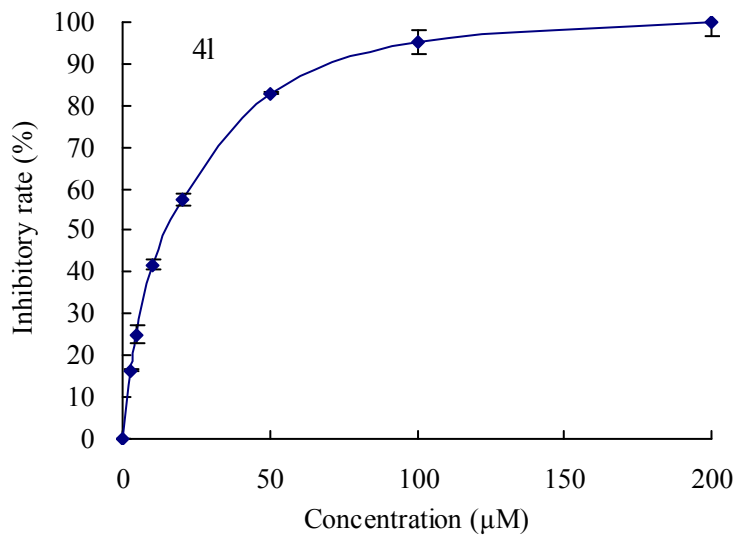

Supplement: c4ob01347f1.pdf [file c4ob01347f1.pdf]
